# Supplementary material
Source: PubMed Central journal article supplement (PMC8226036)
Supplement: mmc4.pdf [file mmc4.pdf]

**Supplementary table 1.** Analysis of the literature data.

| First author                   | Study design | All adverse reactions,<br>n (%) |            | Severe adverse reactions,<br>n (%) |             | CP infusion-related<br>adverse reactions, n (%) |            | Thromboembolic adverse<br>reactions, n (%) |            |
|--------------------------------|--------------|---------------------------------|------------|------------------------------------|-------------|-------------------------------------------------|------------|--------------------------------------------|------------|
|                                |              | CP group                        | ST group   | CP group                           | ST group    | All                                             | Severe     | CP group                                   | ST group   |
| Abolghashemi <sup>1</sup>      | NRCT         | NA                              | NA         | NA                                 | NA          | 1/115 (0.9)                                     | 0/115      | NA                                         | NA         |
| Ah Yoon <sup>2</sup>           | NRCT         | NA                              | NA         | NA                                 | NA          | 0/73                                            | 0/73       | NA                                         | NA         |
| AlQahtani <sup>3</sup>         | RCT          | 3/20 (15.0)                     | 0/20       | 0/20                               | 0/20        | 0/20                                            | 0/20       | 0/20                                       | 0/20       |
| Alsharidah <sup>4</sup>        | NRCT         | NA                              | NA         | NA                                 | NA          | 3/135 (2.2)                                     | 0/135      | NA                                         | NA         |
| AlShehri <sup>5</sup>          | NRCT         | NA                              | NA         | NA                                 | NA          | 0/40                                            | 0/40       | NA                                         | NA         |
| Bajpai <sup>6*</sup>           | RCT          | 1/14 (7.1)                      | 1/15 (6.7) | 0/14                               | 0/15        | 1/14 (7.1)                                      | 0/14       | NA                                         | NA         |
| Balcells <sup>7**</sup>        | RCT          | 4/41 (9.8)                      | -          | 3/41 (7.3)                         | -           | 2/41 (4.9)                                      | 1/41 (2.4) | 0/41                                       | -          |
| Budhiraja <sup>8</sup>         | NRCT         | NA                              | NA         | NA                                 | NA          | 2/333 (0.6)                                     | 0/333      | NA                                         | NA         |
| ConCOVID Trial <sup>9</sup>    | RCT          | NA                              | NA         | NA                                 | NA          | 0/43                                            | 0/43       | NA                                         | NA         |
| ConPlas-19 Study <sup>10</sup> | RCT          | NA                              | NA         | 6/38 (15.8)                        | 7/43 (16.3) | 2/38 (5.3)                                      | 2/38 (5.3) | 1/38 (2.6)                                 | 2/43 (4.6) |
| Donato <sup>11</sup>           | NRCT         | NA                              | NA         | NA                                 | NA          | 1/51 (2.0)                                      | 0/51       | NA                                         | NA         |
| Duan <sup>12</sup>             | NRCT         | NA                              | NA         | NA                                 | NA          | 1/10 (10.0)                                     | 0/10       | 0/10                                       | NA         |
| Hamdy Salman <sup>13</sup>     | RCT          | NA                              | NA         | NA                                 | NA          | 0/15                                            | 0/15       | NA                                         | NA         |
| Hatzl <sup>14</sup>            | NRCT         | NA                              | NA         | NA                                 | NA          | 0/48                                            | 0/48       | NA                                         | NA         |
| Klapholz <sup>15</sup>         | NRCT         | NA                              | NA         | NA                                 | NA          | 0/47                                            | 0/47       | NA                                         | NA         |

|                                    |      |                  |                  |               |               |               |               |               |               |
|------------------------------------|------|------------------|------------------|---------------|---------------|---------------|---------------|---------------|---------------|
| Li <sup>16</sup>                   | RCT  | 2/52 (3.8)       | 0/51             | 1/52 (1.9)    | 0/52          | 2/52 (3.8)    | 1/52 (1.9)    | 0/52          | 0/51          |
| Libster <sup>17</sup>              | RCT  | 0/79             | 1/80 (1.2)       | 0/79          | 0/80          | 0/80          | 0/80          | 0/79          | 1/80 (1.2)    |
| Liu <sup>18</sup>                  | NRCT | NA               | NA               | NA            | NA            | 0/39          | 0/39          | NA            | NA            |
| Moniuszko-Malinowska <sup>19</sup> | NRCT | NA               | NA               | NA            | NA            | 0/78          | 0/78          | NA            | NA            |
| O'Donnell <sup>20*</sup>           | RCT  | 96/147 (65.3)    | 40/72 (55.6)     | 39/147 (26.5) | 26/72 (36.1)  | 4/147 (2.7)   | 2/147 (1.4)   | 6/147 (4.1)   | 3/72 (4.2)    |
| Pappa <sup>21</sup>                | NRCT | 4/59 (6.8)       | NA               | 1/59 (1.7)    | NA            | 1/59 (1.7)    | 1/59 (1.7)    | NA            | NA            |
| PLACID Trial <sup>22</sup>         | RCT  | NA               | NA               | 3/235 (1.3)   | 0/229         | 3/235 (1.3)   | 3/235 (1.3)   | NA            | NA            |
| PlasmAr Study <sup>23</sup>        | RCT  | 153/228 (67.1)   | 66/105 (62.9)    | 54/228 (23.7) | 19/105 (18.1) | 13/228 (5.7)  | NA            | 4/228 (1.7)   | 0/105         |
| Rasheed <sup>24</sup>              | RCT  | NA               | NA               | NA            | NA            | 1/21 (4.8)    | 0/21          | NA            | NA            |
| Ray <sup>25</sup>                  | RCT  | NA               | NA               | NA            | NA            | 0/40          | 0/40          | NA            | NA            |
| Rogers <sup>26</sup>               | NRCT | NA               | NA               | NA            | NA            | 3/64 (4.7)    | 3/64 (4.7)    | Na            | NA            |
| Salazar <sup>27</sup>              | NRCT | NA               | NA               | NA            | NA            | 7/351 (2.9)   | 2/351 (0.6)   | NA            | NA            |
| Recovery Trial <sup>28</sup>       | RCT  | 1433/5267 (27.2) | 1427/5128 (27.8) | NA            | NA            | 13/5795 (0.2) | 13/5795 (0.2) | 73/5267 (1.4) | 87/5128 (1.7) |
| Xia <sup>29</sup>                  | NRCT | NA               | NA               | NA            | NA            | 3/138 (2.2)   | 0/138         | NA            | NA            |
| Zeng <sup>30</sup>                 | NRCT | NA               | NA               | NA            | NA            | 0/6           | 0/6           | NA            | NA            |

Legend: RCT, randomized controlled trial; NRCT, non-randomized controlled trial; CP, convalescent plasma; ST, standard treatment; NA, not available.

\*Control group received non-hyperimmune normal plasma.

\*\*Early versus deferred convalescent plasma.

## References

1. Abolghasemi H, Eshghi P, Cheraghali AM, et al. Clinical efficacy of convalescent plasma for treatment of COVID-19 infections: Results of a multicenter clinical study. *Transfus Apher Sci.* 2020;59:102875.
2. Yoon HA, Bartash R, Gendlina I, et al. Treatment of severe COVID-19 with convalescent plasma in Bronx, NYC. *JCI Insight.* 2021;6(4):e142270.
3. AlQahtani M, Abdulkarim A, Almadani A, et al. Randomized controlled trial of convalescent plasma therapy against standard therapy in patients with severe COVID-19 disease. *medRxiv.* 2020; Available at: <https://www.medrxiv.org/content/10.1101/2020.11.02.20224303v1.full>.
4. Alsharidah S, Ayed M, Ameen RM, et al. COVID-19 convalescent plasma treatment of moderate and severe cases of SARS-CoV-2 infection: A multicenter interventional study. *Int J Infect Dis.* 2021;103:439-446.
5. AlShehry N, Zaidi SZA, AlAskar A, et al.; KSA COVID-19 Convalescent Plasma Study Group. Safety and Efficacy of Convalescent Plasma for Severe COVID-19: Interim Report of a Multicenter Phase II Study from Saudi Arabia. *Saudi J Med Med Sci.* 2021;9(1):16-23.
6. Bajpai M, Kumar S, Maheshwari A, et al. Efficacy of convalescent plasma therapy compared to fresh frozen plasma in severely ill COVID-19 patients: a pilot randomized controlled trial. *medRxiv.* 2020;Preprint. doi: 10.1101/2020.10.25.20219337
7. Balcells ME, Rojas L, Le Corre N, et al. Early versus deferred anti-SARS-CoV-2 convalescent plasma in patients admitted for COVID-19: a randomized Phase II clinical trial. *PLoS Med.* 2021;18(3):e1003415.
8. Budhiraja S, Dewan A, Aggarwal R, et al. Effectiveness of convalescent plasma in Indian patients with COVID-19. *Blood Cells Mol Dis.* 2021;88:102548.

9. Gharbharan A, Jordans CCE, Geurtsvankessel C, et al. Convalescent plasma for COVID-19: a randomized clinical trial. *medRxiv*. 2020;Preprint. Available at: <https://www.medrxiv.org/content/10.1101/2020.07.01.20139857v1>.
10. Avendano-Sola C, Ramos-Martinez A, Muñoz-Rubio E, et al. Convalescent plasma for COVID-19: a multicenter, randomized clinical trial. *medRxiv*. 2020;Preprint. Available at: <https://www.medrxiv.org/content/10.1101/2020.08.26.20182444v3.full.pdf>.
11. Donato ML, Park S, Baker M, et al. Clinical and laboratory evaluation of patients with SARS-CoV-2 pneumonia treated with high-titer convalescent plasma. *JCI Insight*. 2021;6(6):e143196.
12. Duan K, Liu B, Li C, et al. Effectiveness of convalescent plasma therapy in severe COVID-19 patients. *Proc Natl Acad Sci U S A*. 2020;117:9490–9496.
13. Hamdy Salman O, Ail Mohamed HS. Efficacy and safety of transfusing plasma from COVID-19 survivors to COVID-19 victims with severe illness. a double-blinded controlled preliminary study. *Egyptian J Anaesth*. 2020;36(1):264-272.
14. Hatzl S, Posch F, Sareban N, et al. Convalescent plasma therapy and mortality in COVID-19 patients admitted to the ICU: a prospective observational study. *Ann Intensive Care*. 2021;11(1):73.
15. Klapholz M, Pentakota SR, Zertuche JP, McKenna M, Roque W, Forsberg M, Packer J, Lal DS, Dever L. Matched Cohort Study of Convalescent COVID-19 Plasma Treatment in Severely or Life Threateningly Ill COVID-19 Patients. *Open Forum Infect Dis*. 2021;8(2):ofab001.
16. Li L, Zhang W, Hu Y, et al. Effect of Convalescent Plasma Therapy on Time to Clinical Improvement in Patients With Severe and Life-threatening COVID-19: A Randomized Clinical Trial. *JAMA*. 2020;324(5):460-470.

17. Libster R, Pérez Marc G, Wappner D, et al; Fundación INFANT–COVID-19 Group. Early High-Titer Plasma Therapy to Prevent Severe Covid-19 in Older Adults. *N Engl J Med.* 2021;384(7):610-618.
18. Liu STH, Lin HM, Baine I, et al. Convalescent plasma treatment of severe COVID-19: a propensity score-matched control study. *Nat Med.* 2020;26(11):1708-1713.
19. Moniuszko-Malinowska A, Czupryna P, Zarębska-Michaluk D, et al. Convalescent Plasma Transfusion for the Treatment of COVID-19-Experience from Poland: A Multicenter Study. *J Clin Med.* 2020;10(1):28.
20. O'Donnell MR, Grinsztejn B, Cummings MJ, et al. A randomized, double-blind, controlled trial of convalescent plasma in adults with severe COVID-19. *medRxiv.* 2021;Preprint. Available at: <https://www.medrxiv.org/content/10.1101/2021.03.12.21253373v1?%25253fcollection=>.
21. Pappa V, Bouchla A, Terpos E, et al. A Phase II Study on the Use of Convalescent Plasma for the Treatment of Severe COVID-19- A Propensity Score-Matched Control Analysis. *Microorganisms.* 2021;9(4):806.
22. Agarwal A, Mukherjee A, Kumar G, Chatterjee P, Bhatnagar T, Malhotra P; PLACID Trial Collaborators. Convalescent plasma in the management of moderate covid-19 in adults in India: open label phase II multicentre randomised controlled trial (PLACID Trial). *BMJ.* 2020;371:m3939.
23. Simonovich VA, Burgos Prats LD, Scibona P, et al; PlasmAr Study Group. A Randomized Trial of Convalescent Plasma in Covid-19 Severe Pneumonia. *N Engl J Med.* 2021;384(7):619-629.
24. Rasheed AM, Fatak DF, Hashim HA, et al The therapeutic potential of convalescent plasma therapy on treating critically-ill COVID-19 patients residing in respiratory care units in hospitals in Baghdad, Iraq. *Infez Med.* 2020;28(3):357-366.

25. Ray Y, Paul SR, Bandopadhyay P, et al. Clinical and immunological benefits of convalescent plasma therapy in severe COVID-19: insights from a single center open label randomised control trial. *medRxiv*. 2020; Preprint. Available at: <https://www.medrxiv.org/content/10.1101/2020.11.25.20237883v1>.
26. Rogers R, Shehadeh F, Mylona EK, et al. Convalescent plasma for patients with severe COVID-19: a matched cohort study. *Clin Infect Dis*. 2020 Oct 10:ciaa1548.
27. Salazar E, Christensen PA, Graviss EA, et al. Significantly Decreased Mortality in a Large Cohort of Coronavirus Disease 2019 (COVID-19) Patients Transfused Early with Convalescent Plasma Containing High-Titer Anti-Severe Acute Respiratory Syndrome Coronavirus 2 (SARS-CoV-2) Spike Protein IgG. *Am J Pathol*. 2021;191(1):90-107.
28. The RECOVERY Collaborative Group, Horby PW, Estcourt L, et al. Convalescent plasma in patients admitted to hospital with COVID-19 (RECOVERY): a randomised, controlled, open-label, platform trial. *medRxiv*. 2021; Preprint. Available at: <https://www.medrxiv.org/content/10.1101/2021.03.09.21252736v1>.
29. Xia X, Li K, Wu L, et al. Improved clinical symptoms and mortality among patients with severe or critical COVID-19 after convalescent plasma transfusion. *Blood*. 2020;136:755–9.
30. Zeng QL, Yu ZJ, Gou JJ, et al. Effect of convalescent plasma therapy on viral shedding and survival in patients with coronavirus disease 2019. *J Infect Dis*. 2020;222:38–43.
